# Supplementary figures and images for: Task specialization across research careers
Source: eLife journal article supplement (doi:10.7554/elife.60586), 2020-10-28

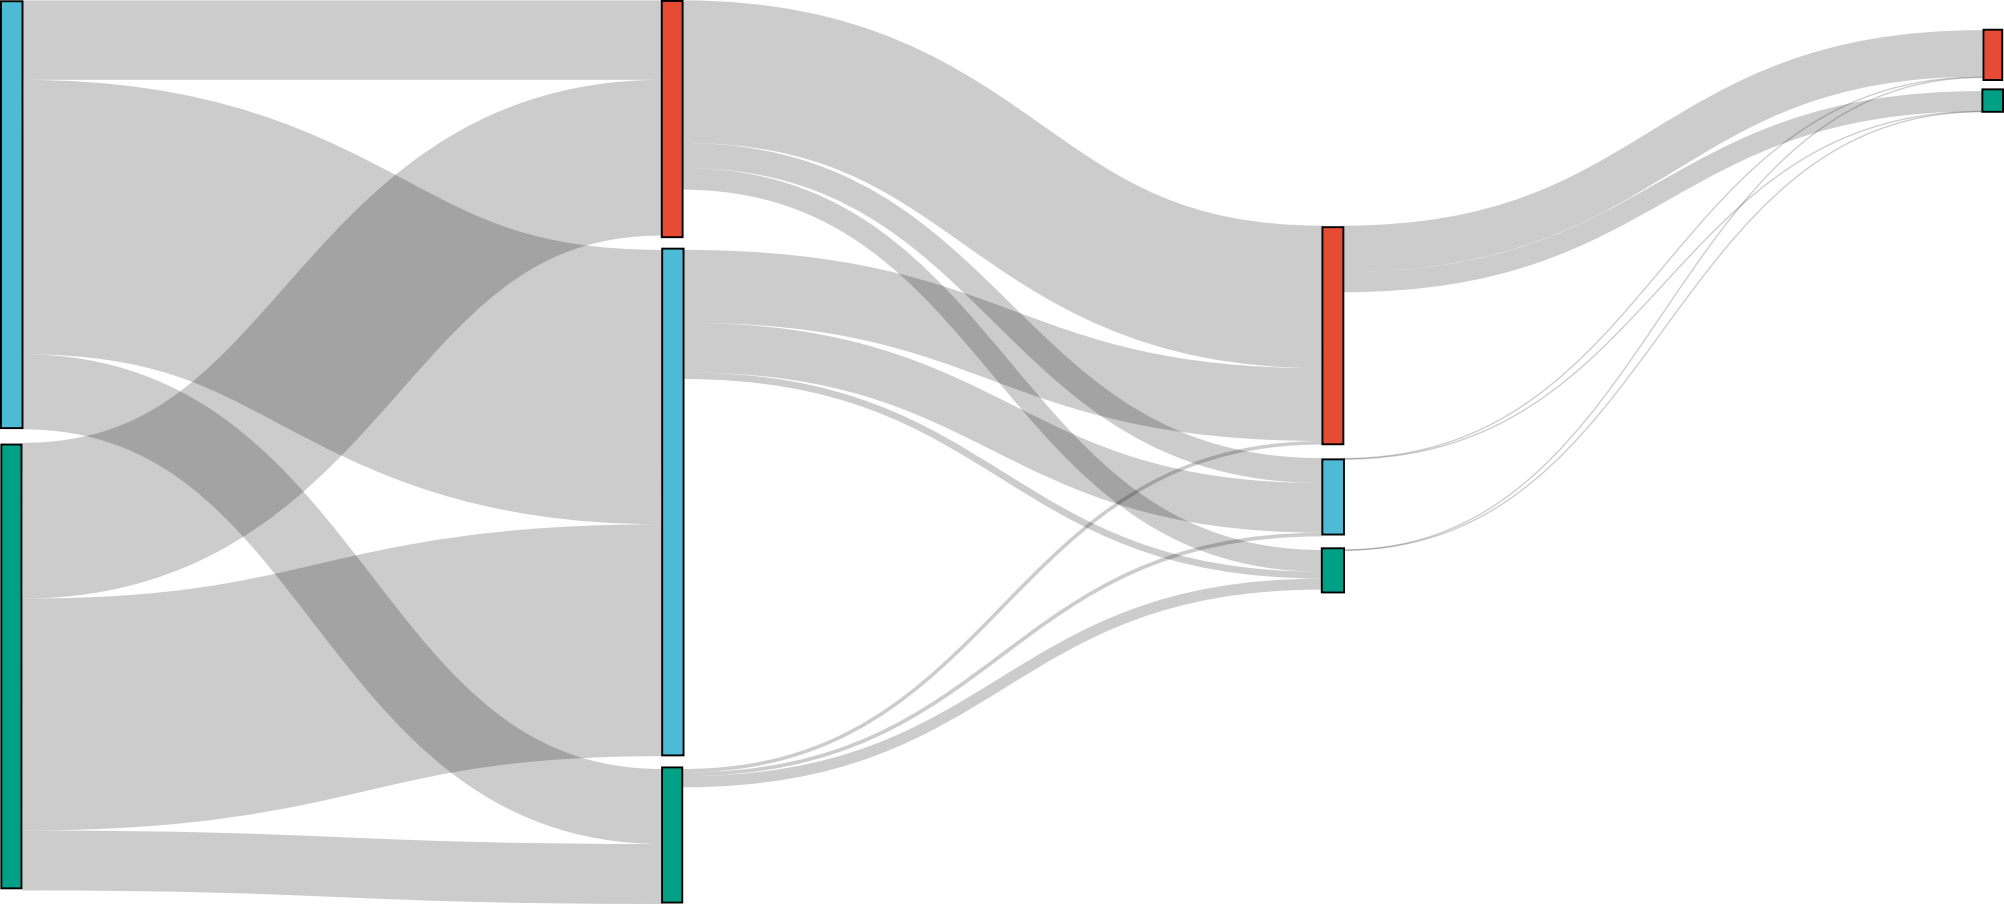

Supplement: supp [file elife-60586-supp-v1.zip]

A

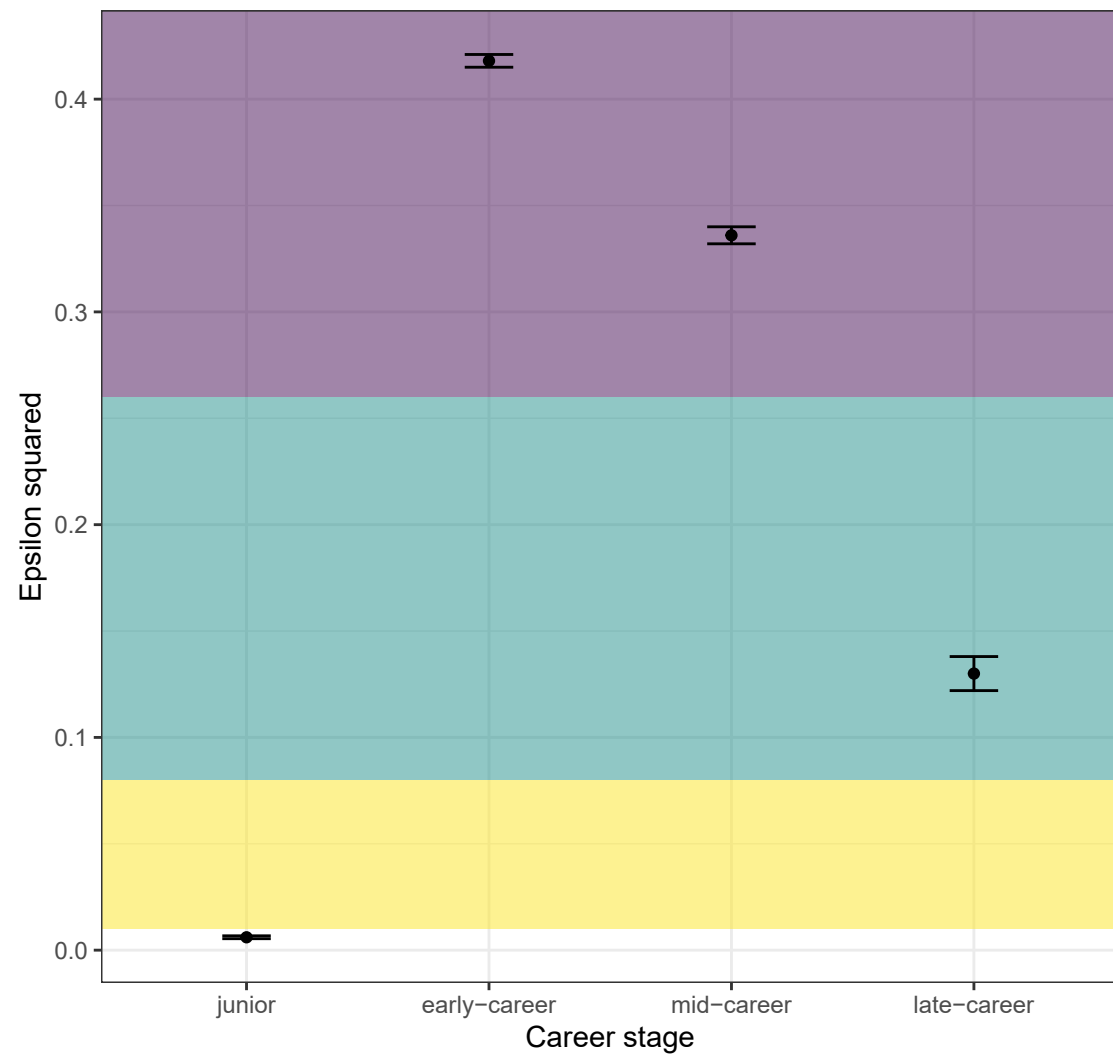

B

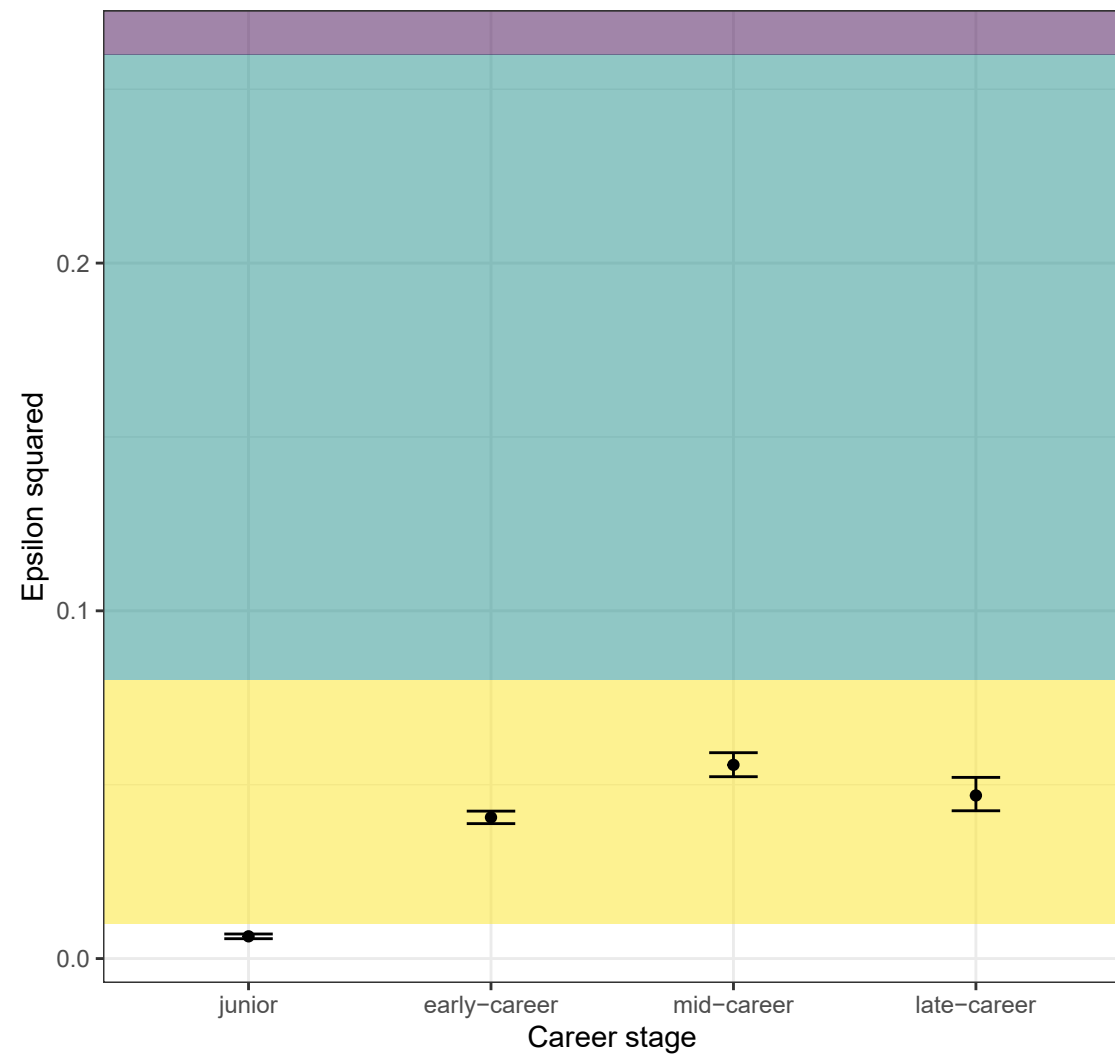

Supplement: supp [file elife-60586-supp-v1.zip]

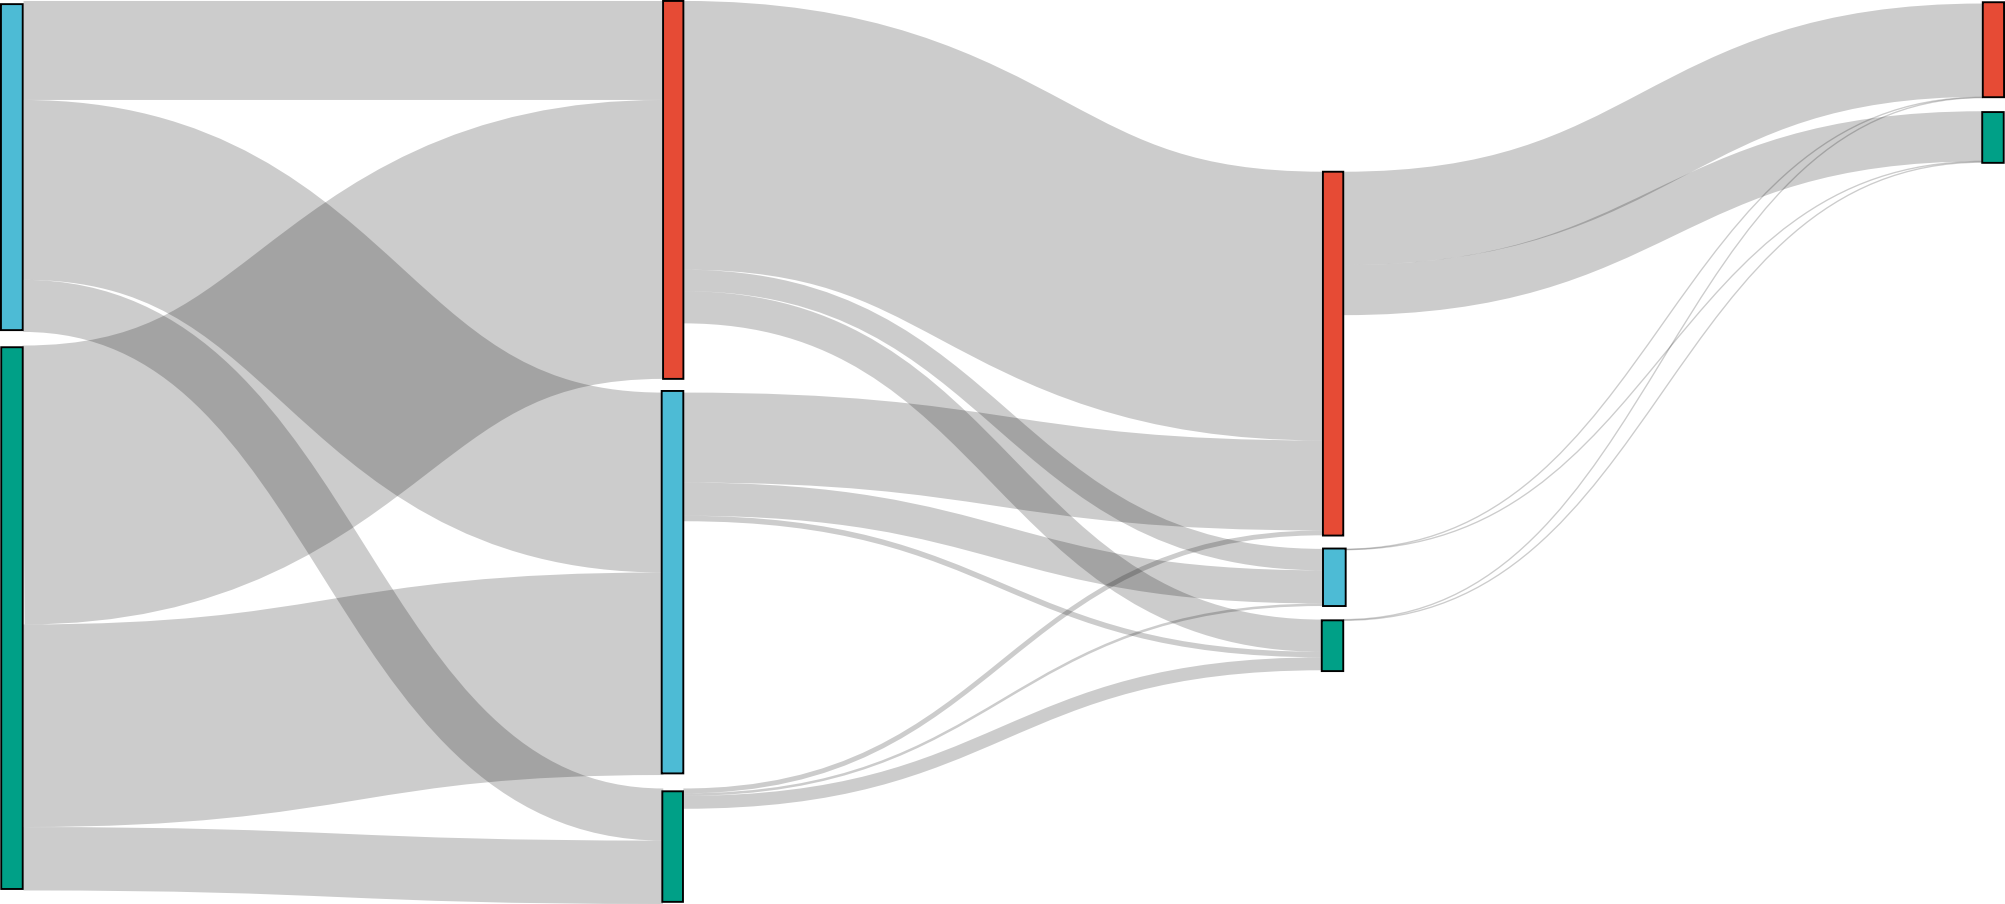

Supplement: supp [file elife-60586-supp-v1.zip]

# Junior stage

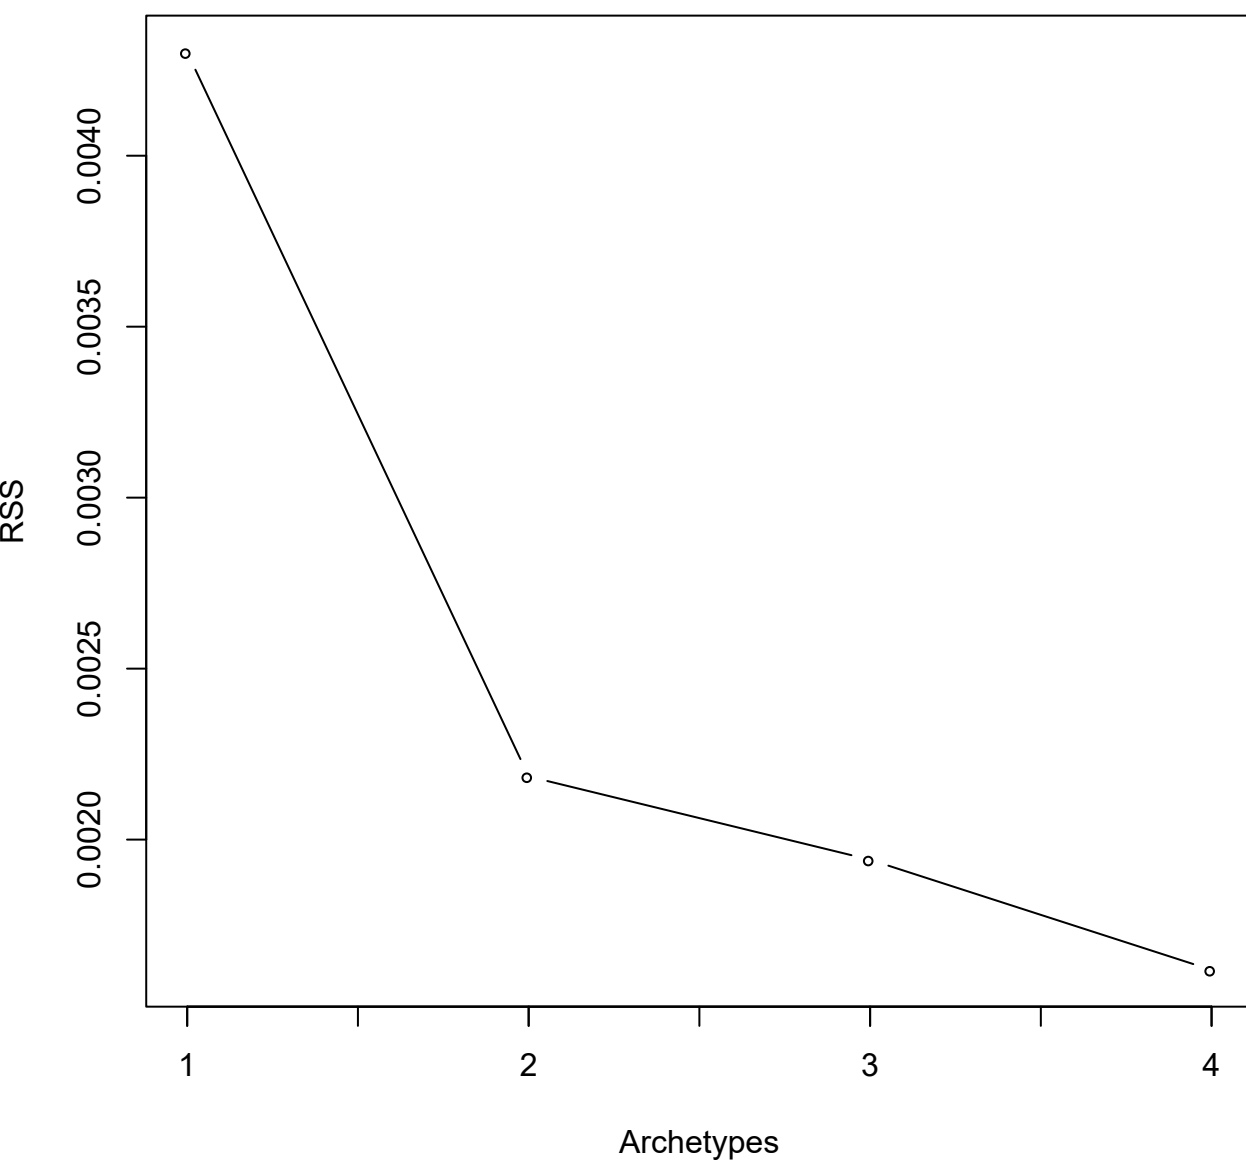

# Early- career stage

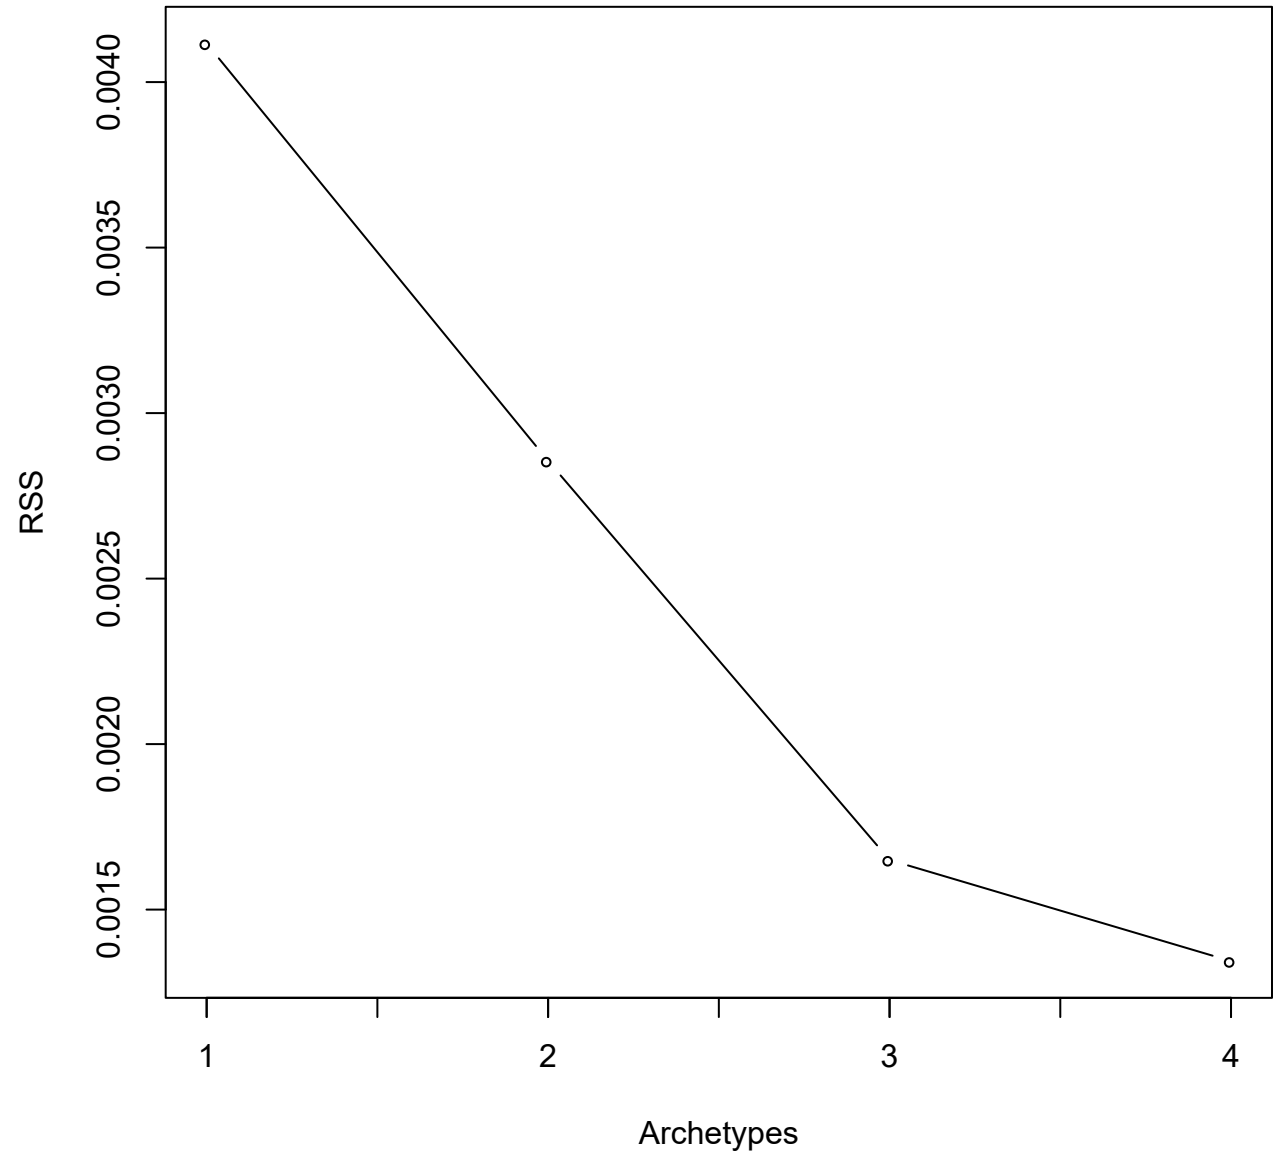

# Mid-career stage

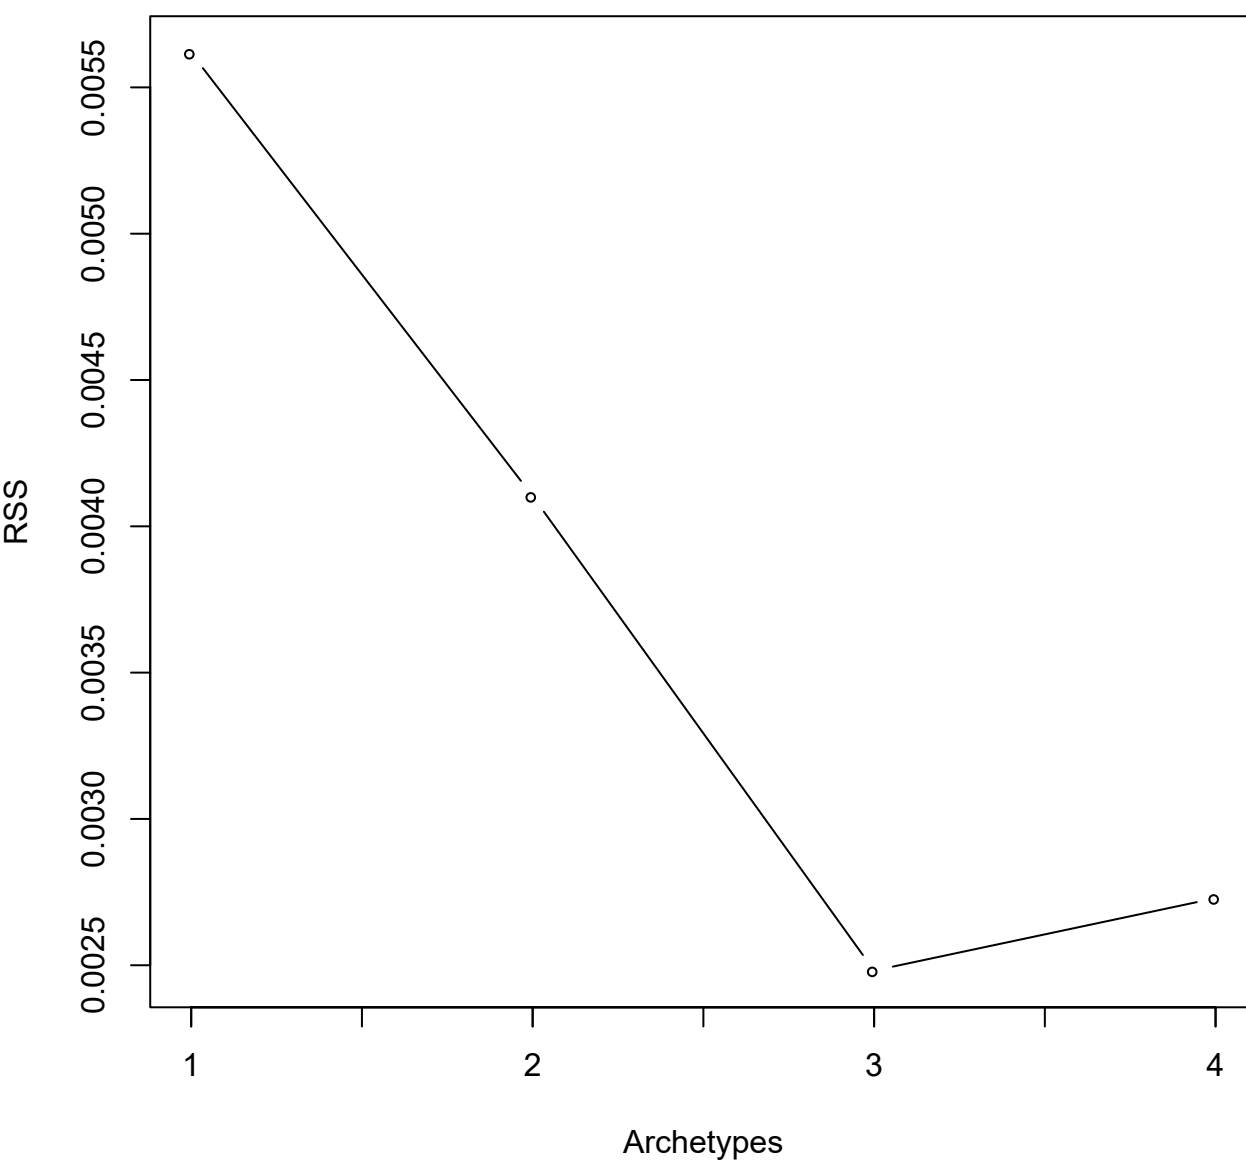

# Full career stage

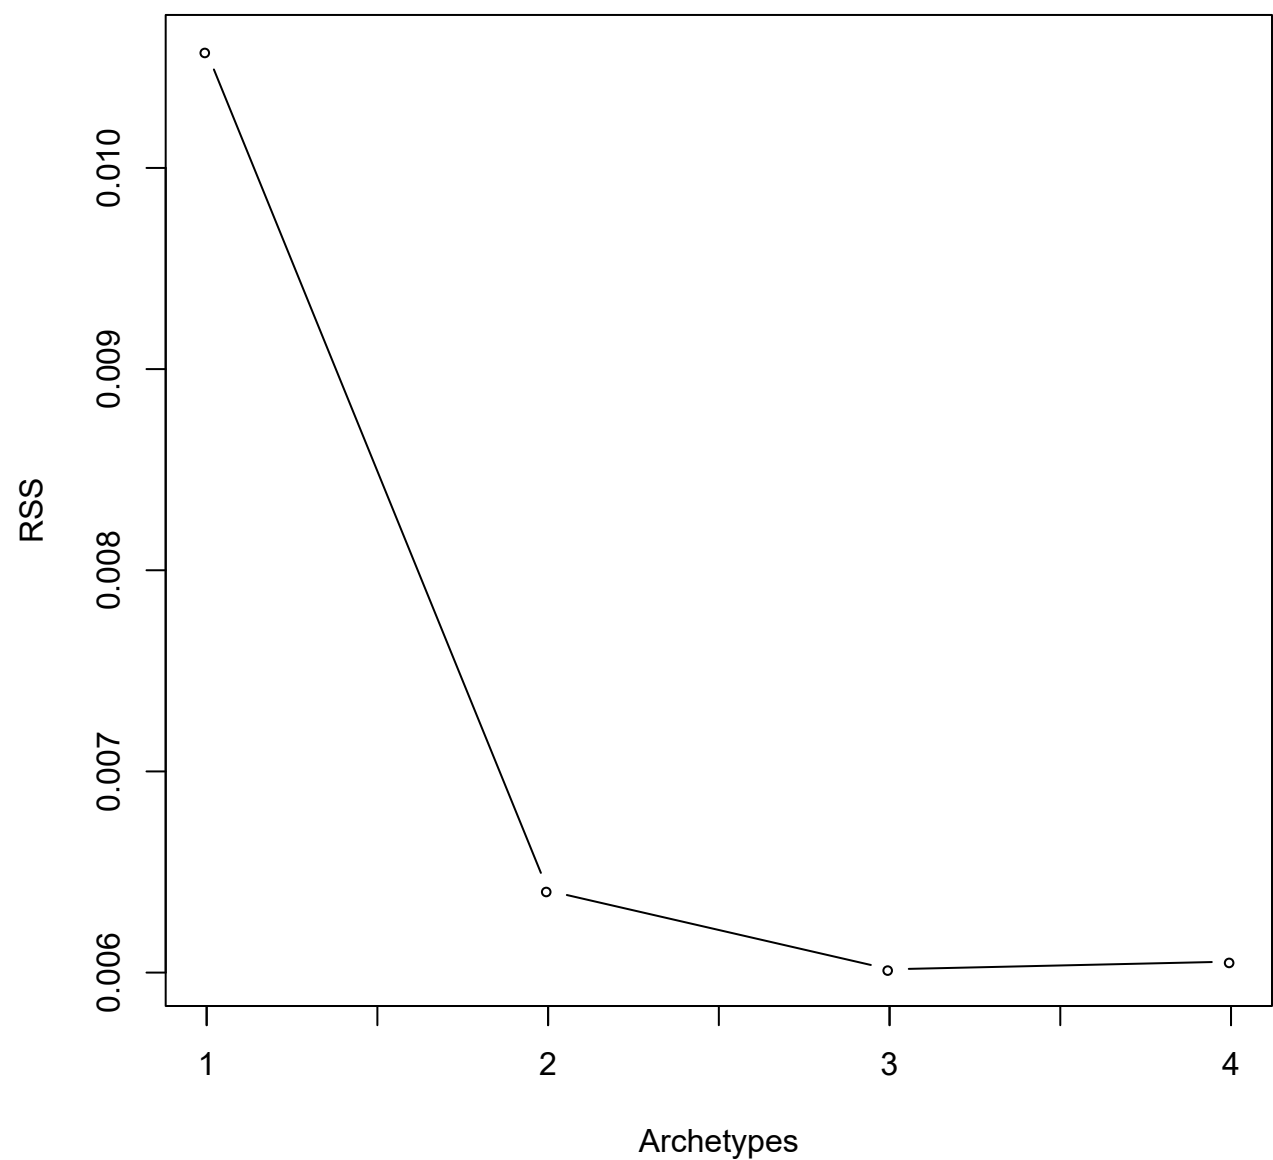

Supplement: supp [file elife-60586-supp-v1.zip]

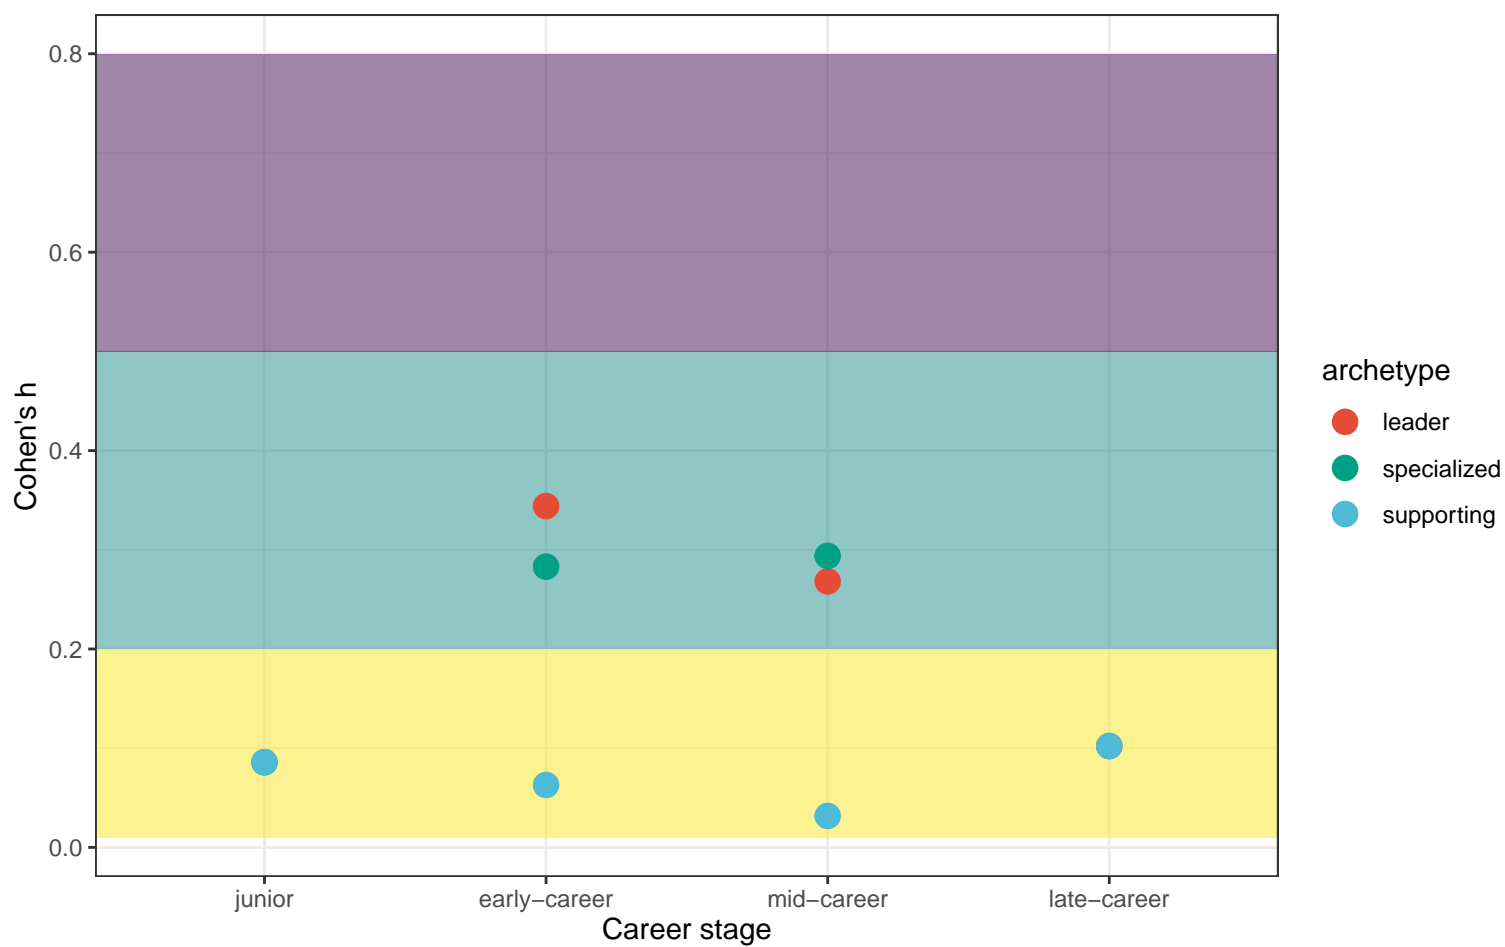

Supplement: supp [file elife-60586-supp-v1.zip]

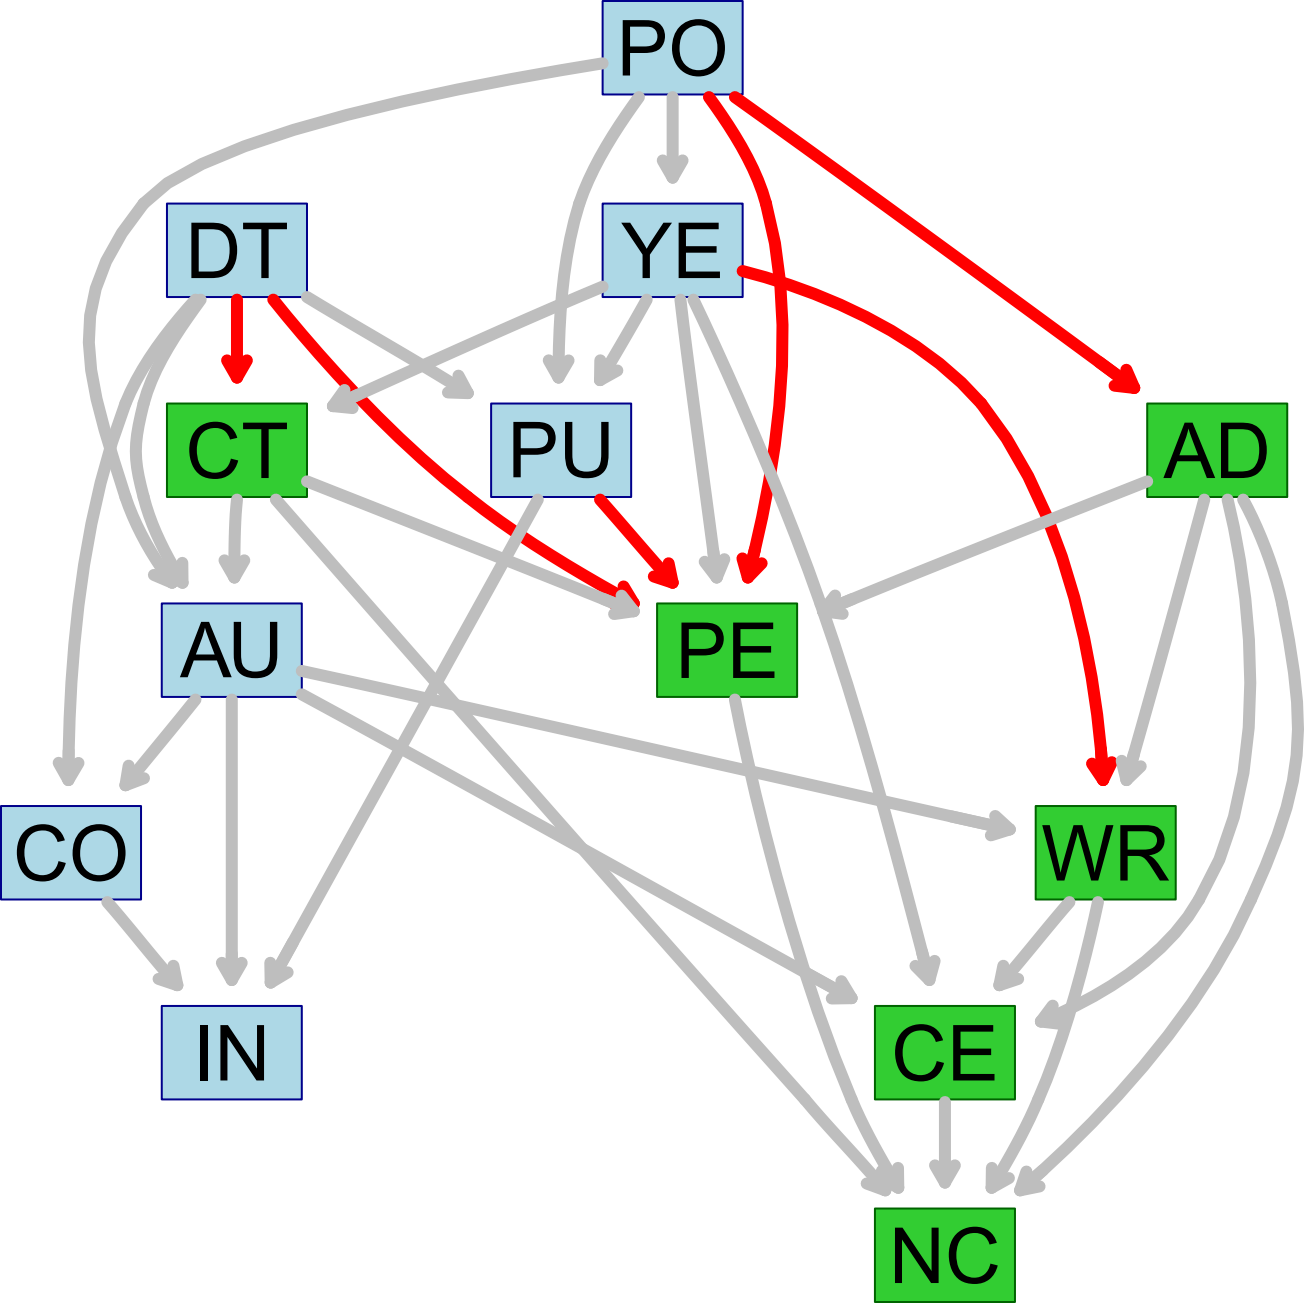

Supplement: supp [file elife-60586-supp-v1.zip]

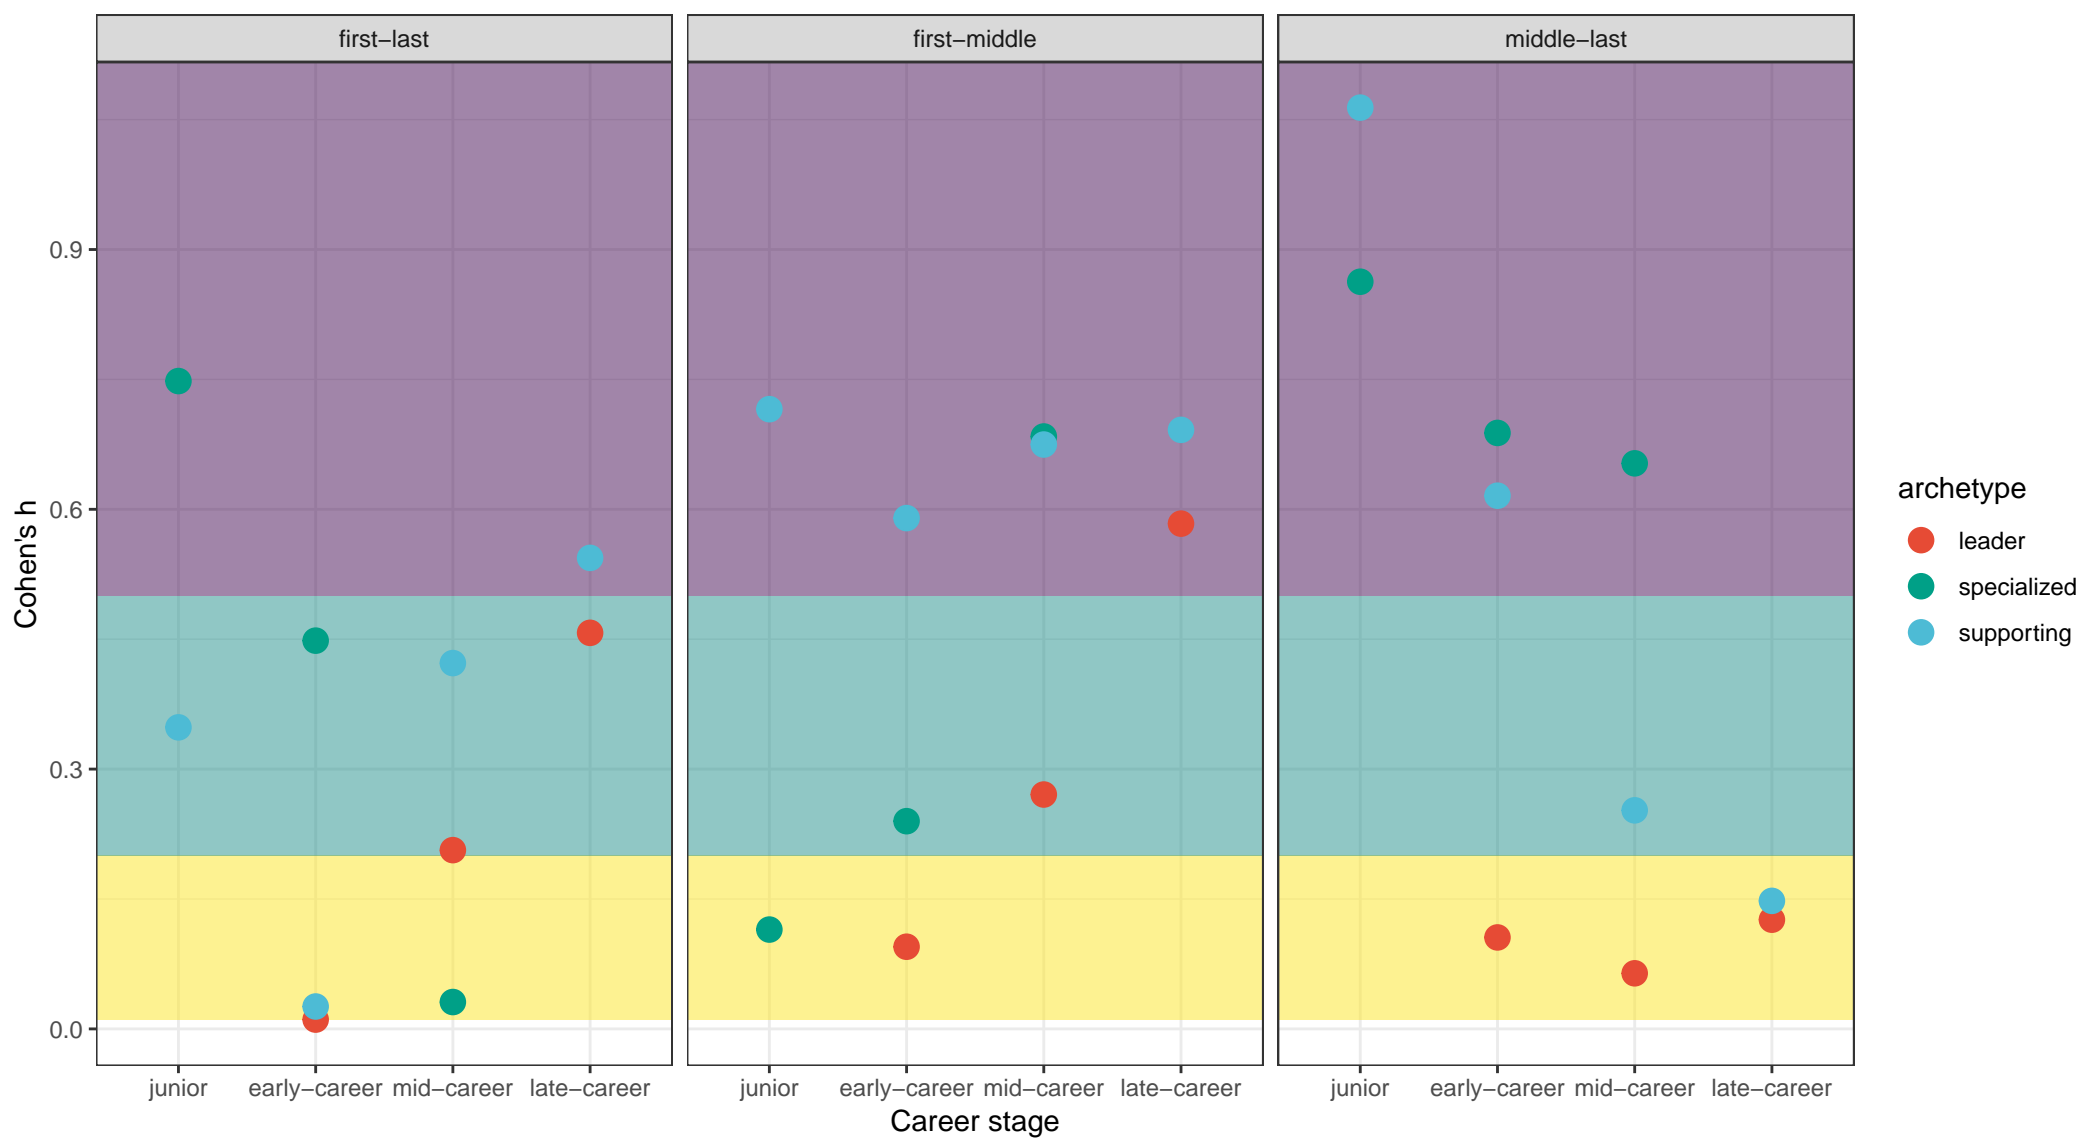

Supplement: supp [file elife-60586-supp-v1.zip]
